# Supplementary material
Source: Copernicus journal article supplement (doi:10.5194/egusphere-2026-2930)
Supplement: Supplementary file 1 [file egusphere-2026-2930-supplement.pdf]

Supplementary material for:

## **Toward shellfish aquaculture circularity: stimulating mussel shell dissolution in marine sediments**

Cedric Goossens, Steven Bouillon, Filip J. R. Meysman, Sebastiaan J. van de Velde

*Correspondence to:* Cedric Goossens ([Cedric.Goossens@uantwerpen.be](mailto:Cedric.Goossens@uantwerpen.be))

### **Table of contents:**

Figure S1. Oxygen saturation changes versus incubation time.

Figure S2. Dissolved inorganic concentration changes versus incubation time.

Figure S3. Total alkalinity concentration changes versus incubation time.

Figure S4. Nitrate concentration changes versus incubation time.

Figure S5. Ammonium concentration changes versus incubation time.

Figure S6. Linear regressions of  $\delta^{13}\text{C}$ -DIC over 1/DIC.

Figure S7. Pictures of shell-amended incubation chambers.

Table S1. Fluxes of oxygen, dissolved inorganic carbon, total alkalinity, nitrate, and ammonium

Table S2. Calcium carbonate dissolution fractions and rates.

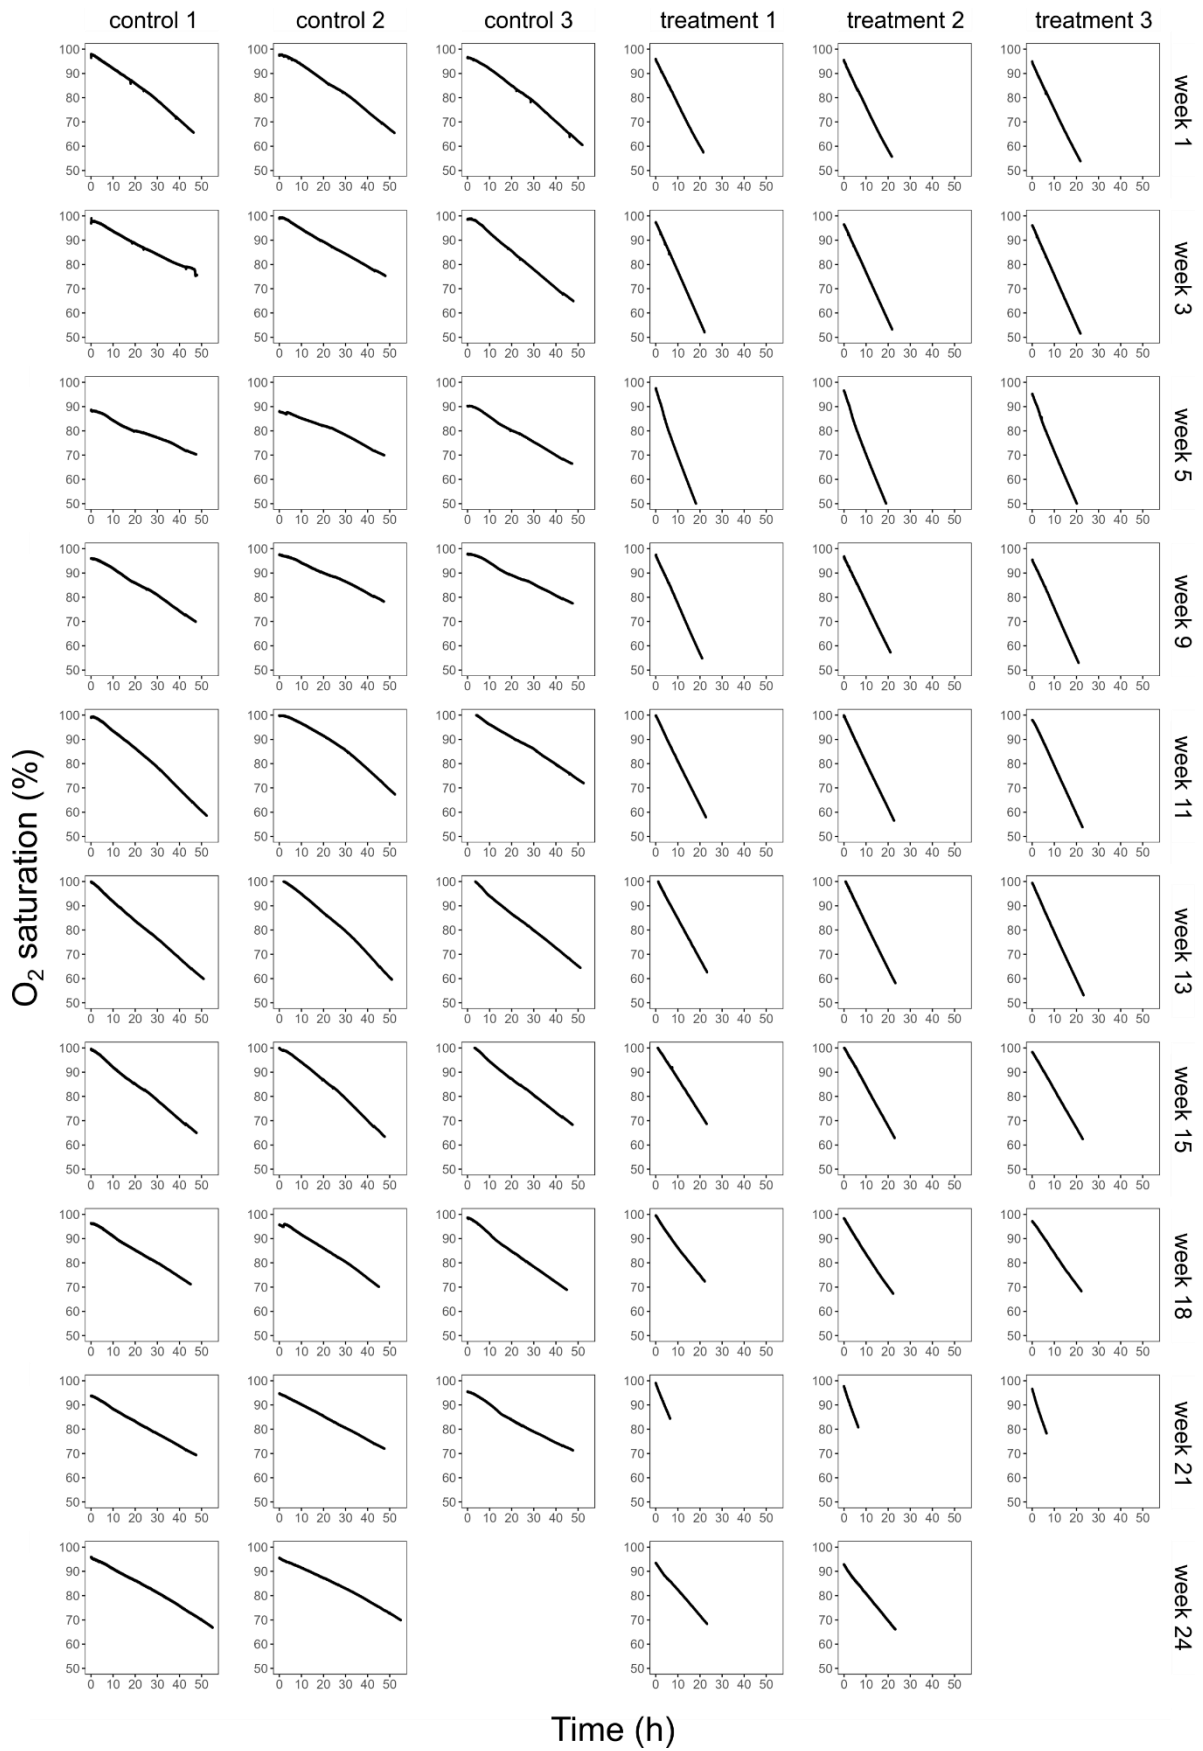

**Figure S1: Oxygen (O<sub>2</sub>) saturation changes versus incubation time, shown for each control and treatment chamber per week.**

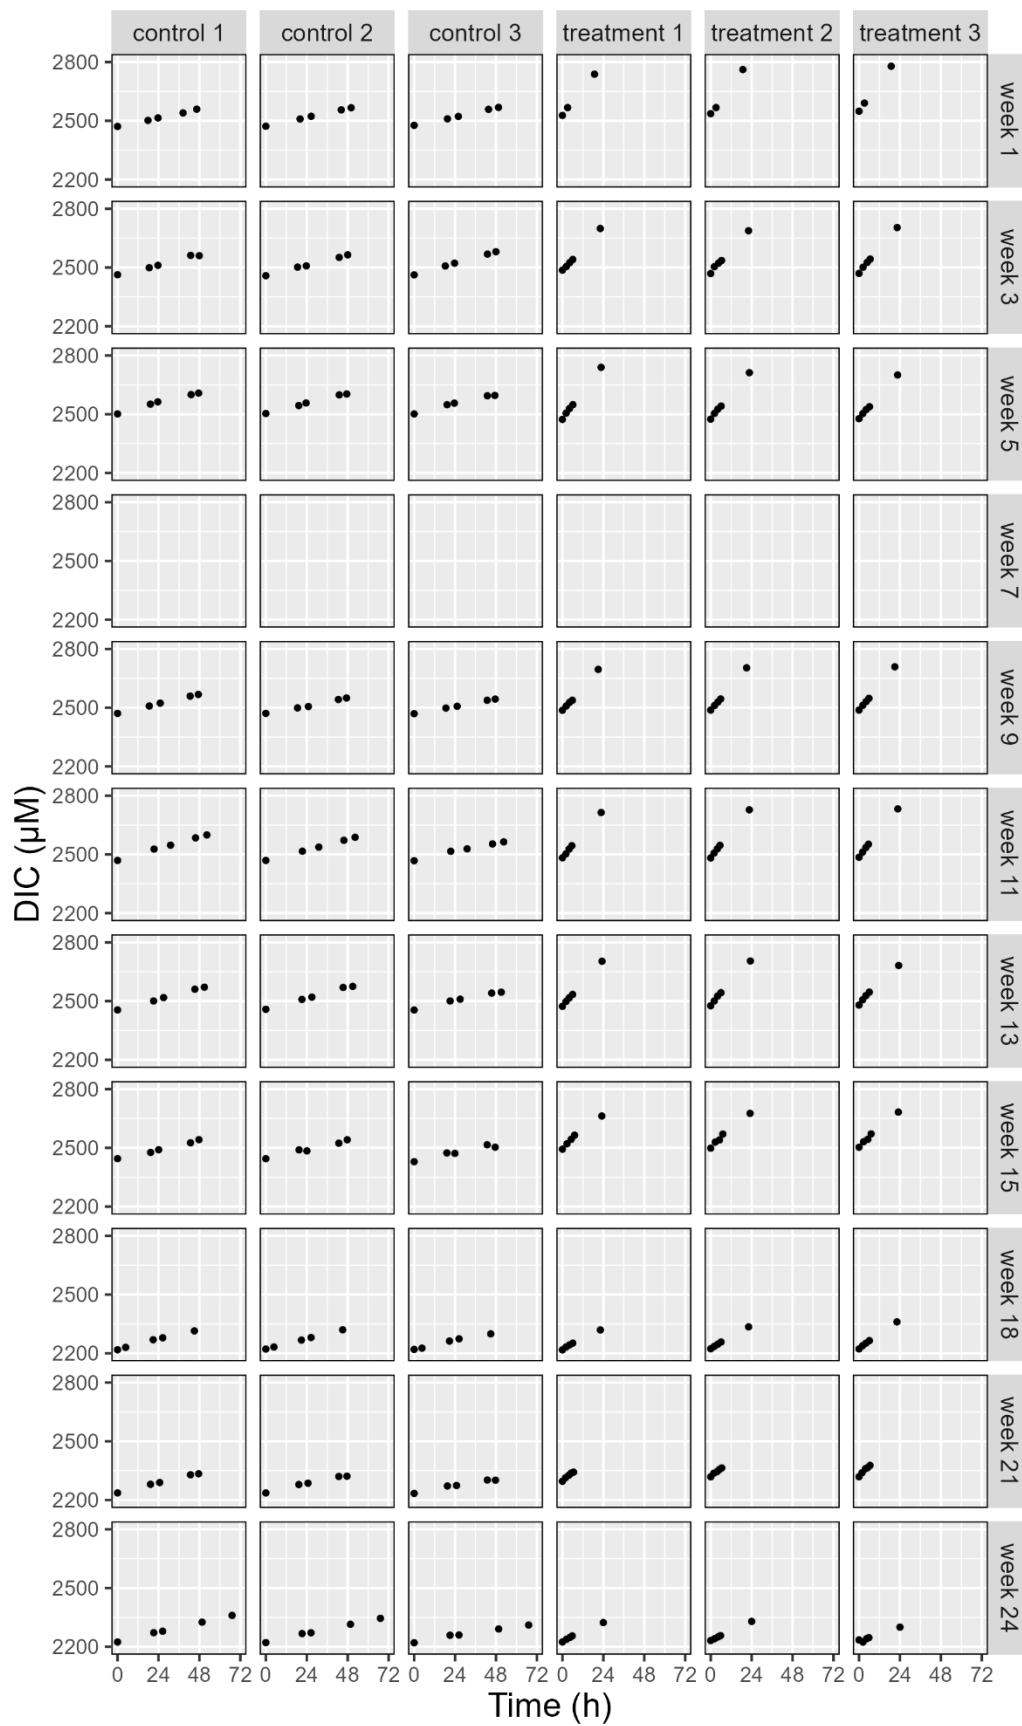

**Figure S2: Dissolved inorganic carbon (DIC) concentration changes versus incubation time, shown for each control and treatment chamber per week.**

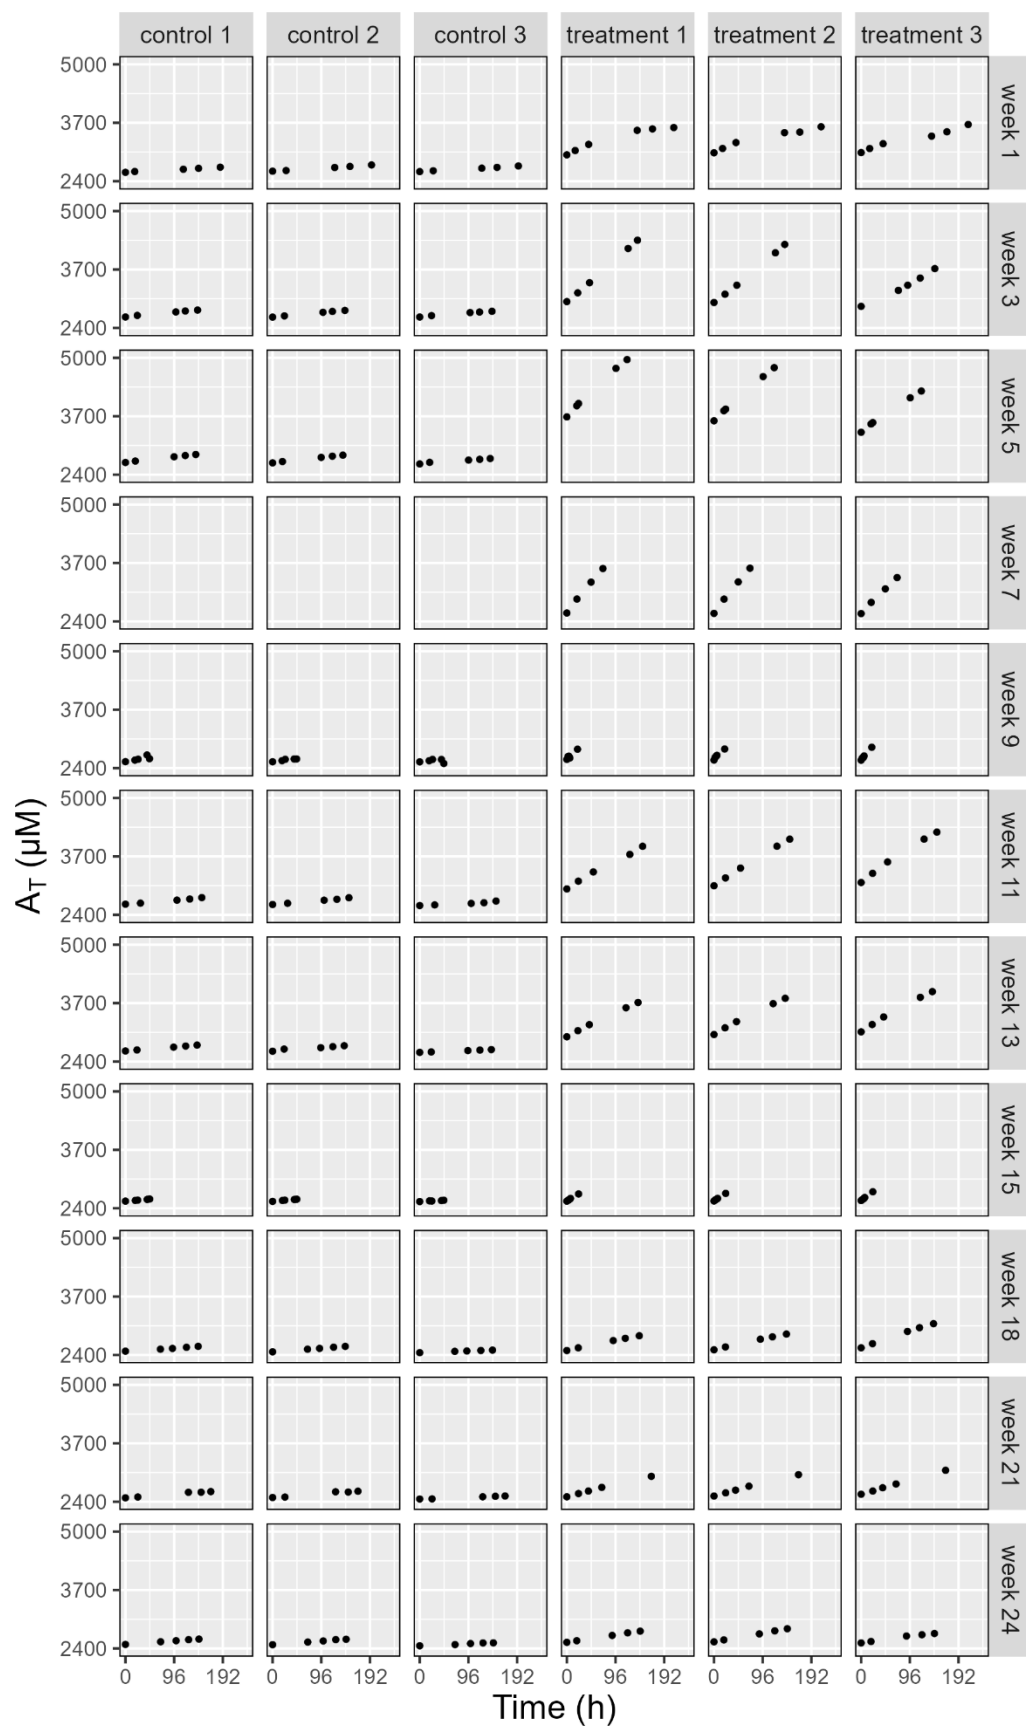

**Figure S3: Total alkalinity ( $A_T$ ) concentration changes versus incubation time, shown for each control and treatment chamber per week.**

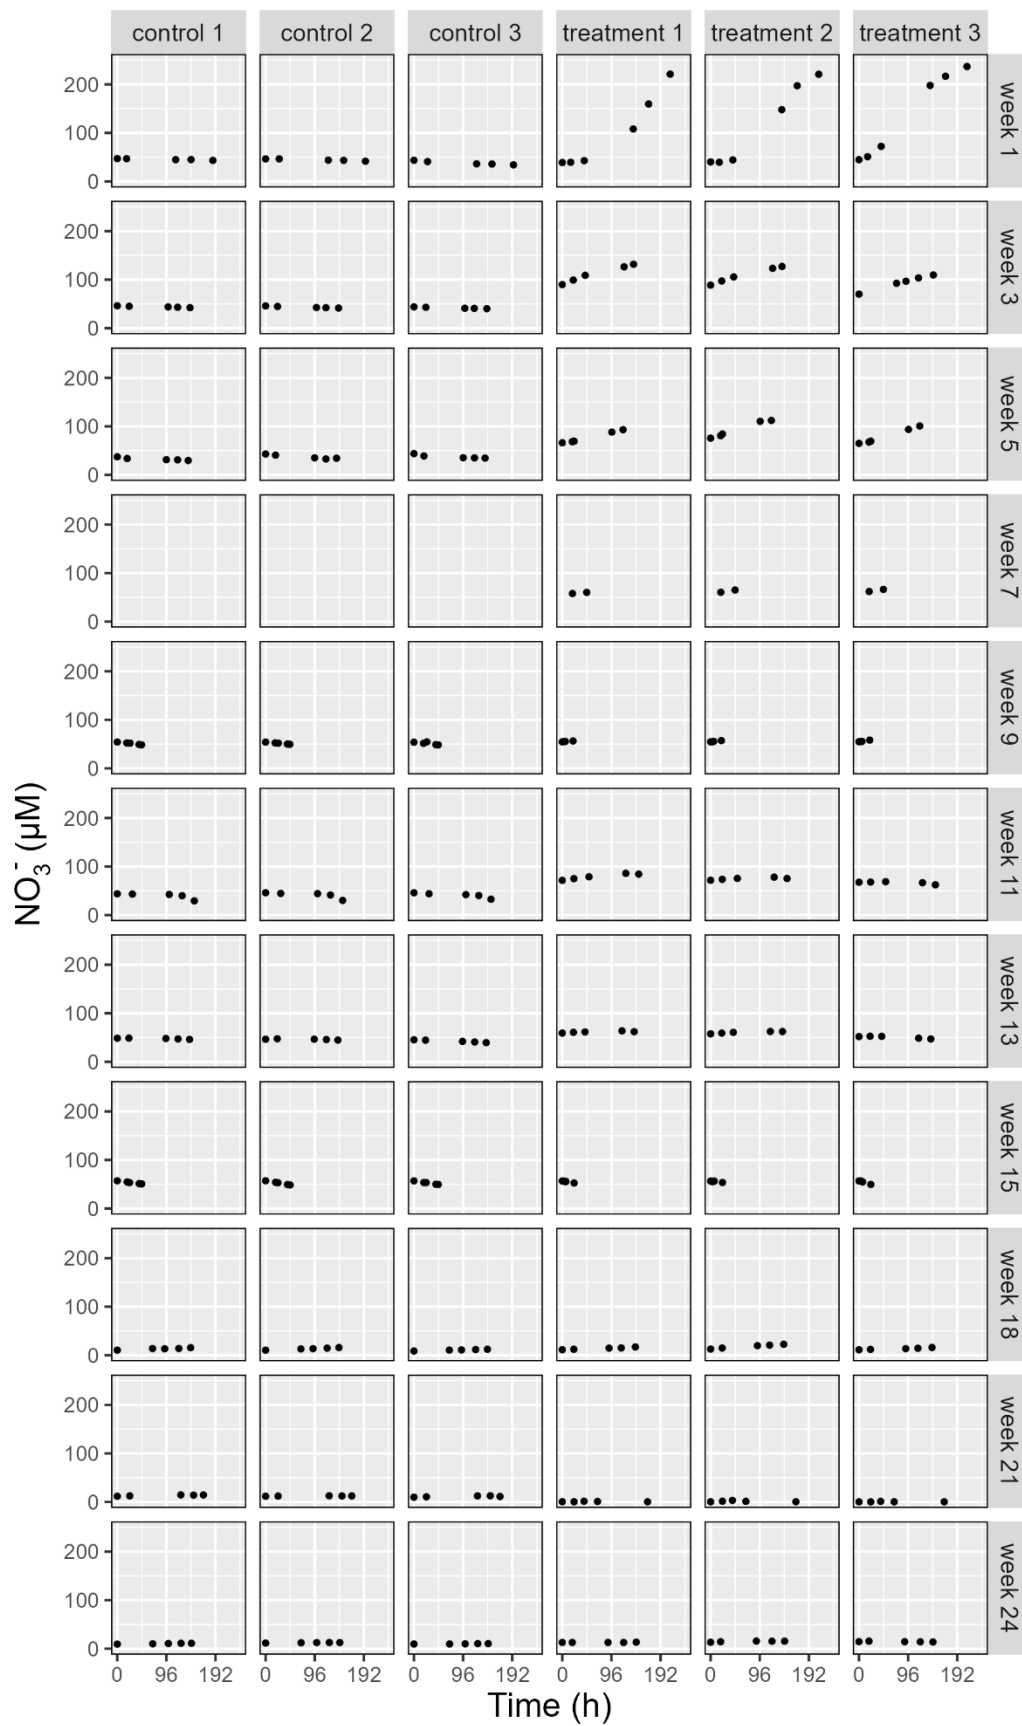

**Figure S4: Nitrate ( $\text{NO}_3^-$ ) concentration changes versus incubation time, shown for each control and treatment chamber per week.**

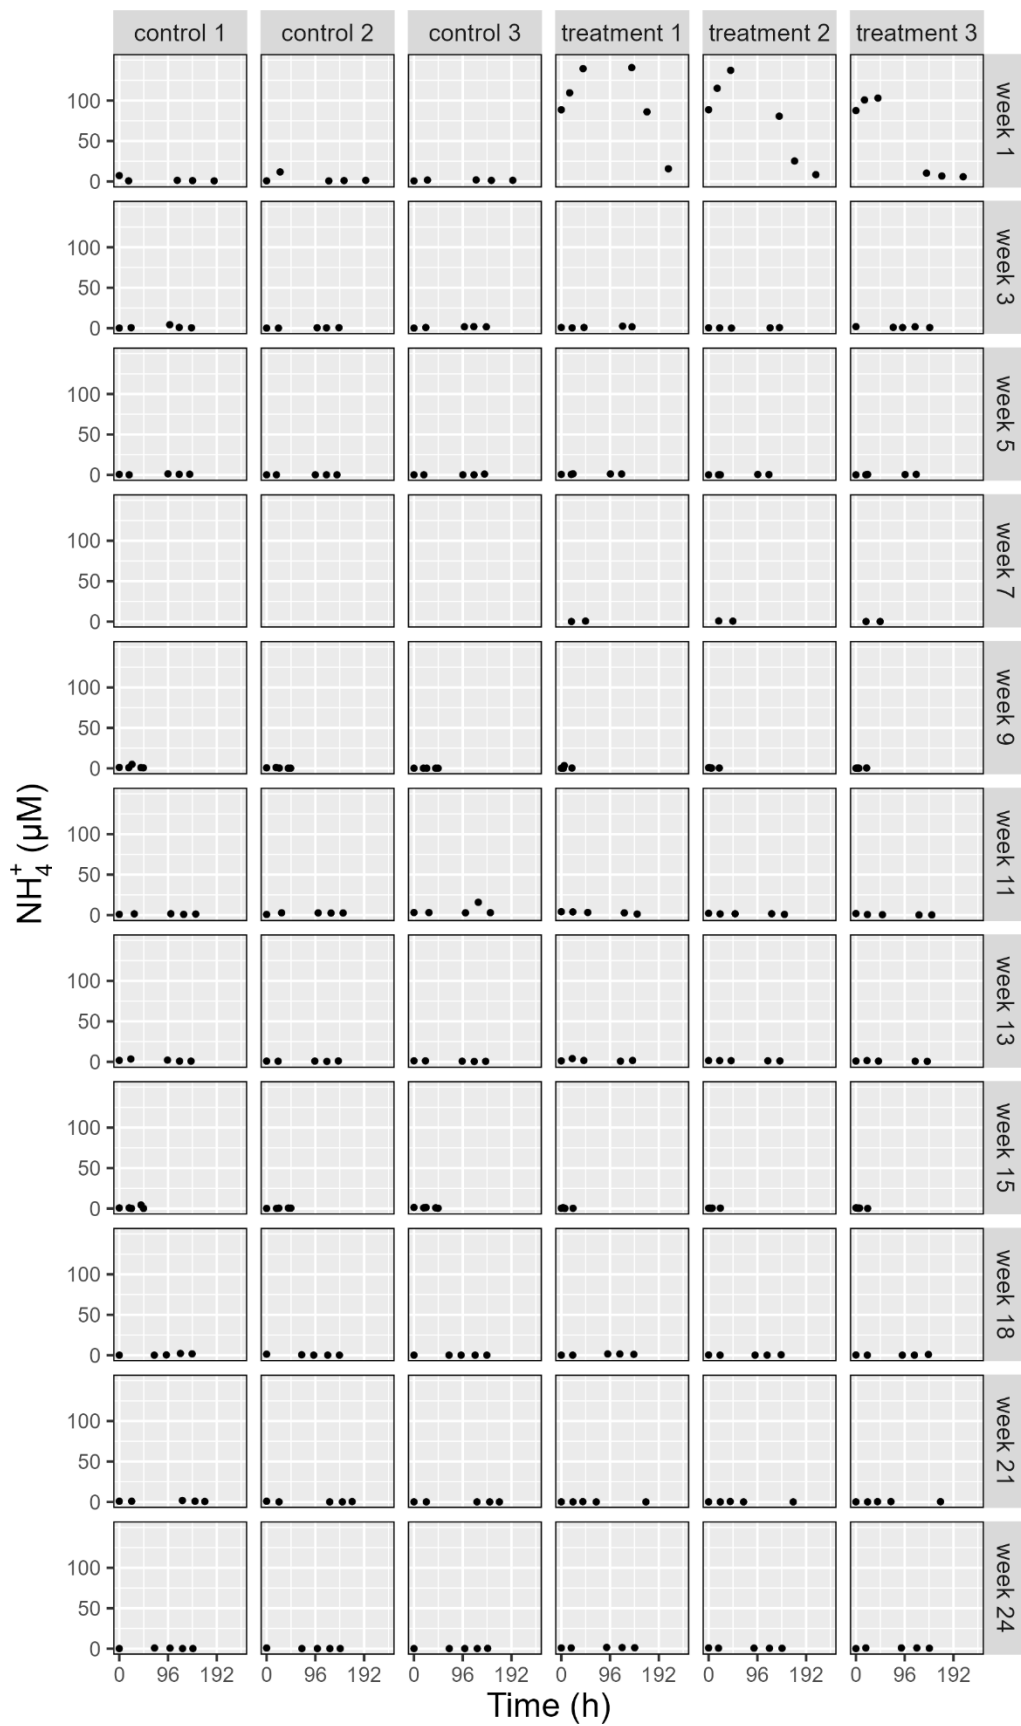

**Figure S5: Ammonium (NH<sub>4</sub><sup>+</sup>) concentration changes versus incubation time, shown for each control and treatment chamber per week.**

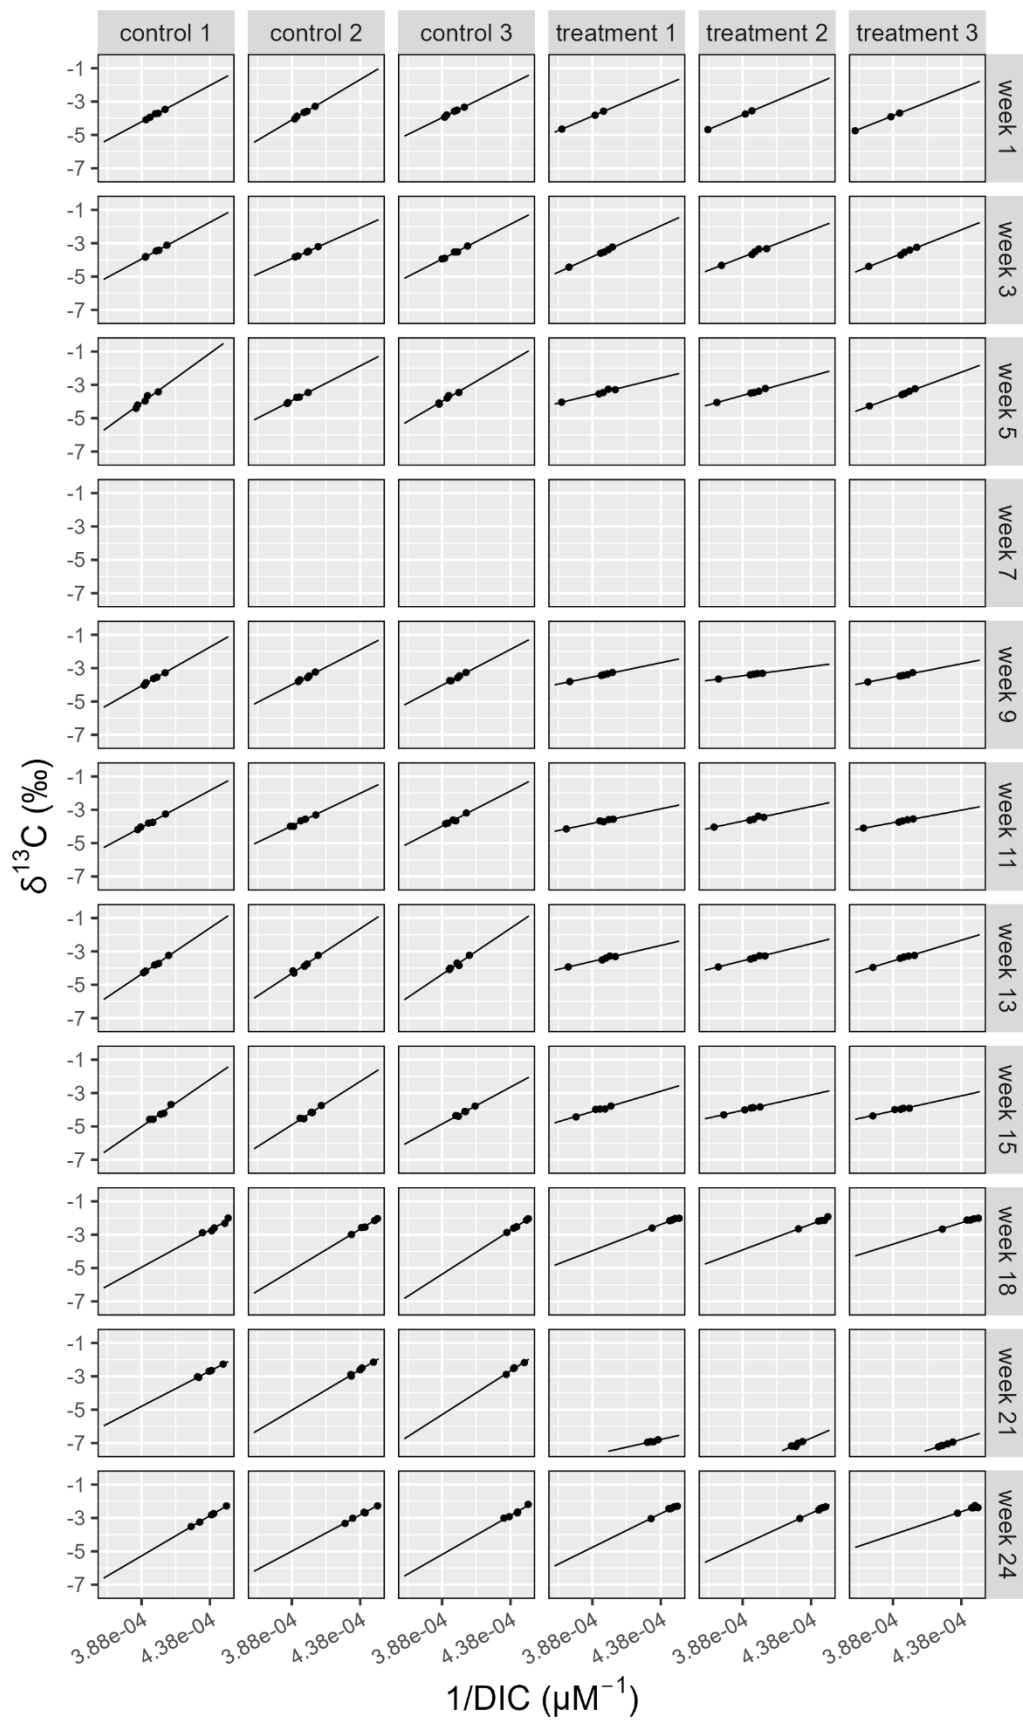

Figure S6: Linear regressions of  $\delta^{13}\text{C}$ -DIC over  $1/\text{DIC}$  for each control and treatment chamber per week.

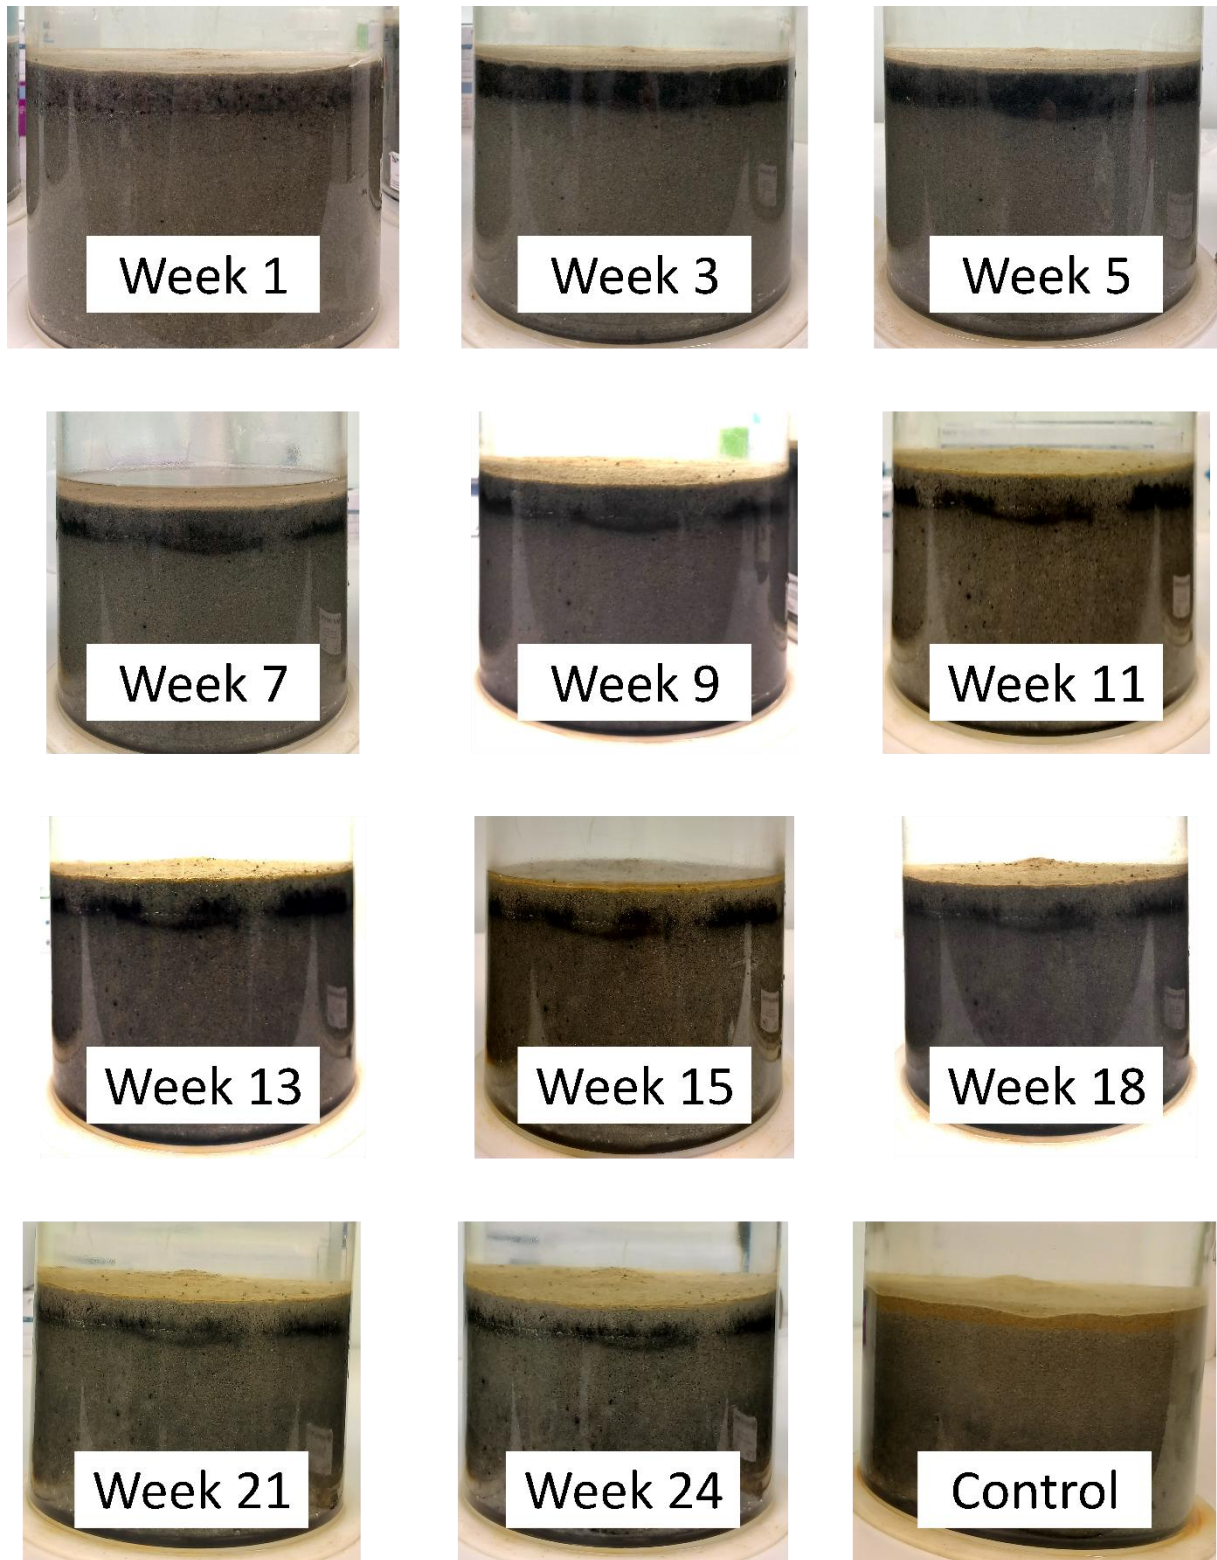

**Figure S7: Pictures of shell-amended incubation chambers per week. A buildup of anoxia in the shell layer was observed, followed by the slow reoxygenation of the sediment. A picture of a control chamber, taken at the end of the experiment, was added for comparison.**

| Week | Treatment | Chamber | FO <sub>2</sub> | p-value  | Model | FDIC | p-value | Model | FA <sub>T</sub> | p-value | Model | FNO <sub>3</sub> <sup>-</sup> | p-value | Model | FNH <sub>4</sub> <sup>+</sup> | p-value | Model |
|------|-----------|---------|-----------------|----------|-------|------|---------|-------|-----------------|---------|-------|-------------------------------|---------|-------|-------------------------------|---------|-------|
| 1    | Control   | C1      | 6.1             | <2.2E-16 | Lin   | 6.9  | 4.8E-05 | Lin   | 2.2             | 6.5E-05 | Lin   | -0.1                          | 4.3E-03 | Lin   | 0.0                           | 2.5E-01 | Lin   |
| 1    | Control   | C2      | 6.3             | <2.2E-16 | Lin   | 7.0  | 7.6E-07 | Lin   | 2.6             | 3.7E-05 | Lin   | -0.1                          | 2.3E-03 | Lin   | 0.0                           | 4.4E-01 | Lin   |
| 1    | Control   | C3      | 6.3             | <2.2E-16 | Lin   | 7.0  | 3.5E-05 | Lin   | 2.3             | 3.2E-05 | Lin   | -0.2                          | 2.4E-03 | Lin   | 0.0                           | 5.5E-01 | Lin   |
| 1    | Treatment | C4      | 16.2            | <2.2E-16 | Lin   | 41.5 | 1.7E-02 | Lin   | 21.8            | 2.3E-04 | Quad  | 6.6                           | NA      | Quad  | 4.9                           | NA      | Quad  |
| 1    | Treatment | C5      | 17.1            | <2.2E-16 | Lin   | 44.4 | 1.7E-02 | Lin   | 21.7            | 5.6E-03 | Quad  | 4.7                           | 6.5E-01 | Quad  | 6.7                           | NA      | Quad  |
| 1    | Treatment | C6      | 16.7            | <2.2E-16 | Lin   | 43.4 | 7.2E-03 | Lin   | 14.3            | 3.6E-01 | Quad  | 6.0                           | 5.9E-02 | Quad  | 3.7                           | NA      | Quad  |
| 3    | Control   | C1      | 4.2             | <2.2E-16 | Lin   | 8.0  | 6.8E-04 | Lin   | 3.9             | 9.6E-05 | Lin   | -0.1                          | 2.8E-03 | Lin   | 0.0                           | 6.3E-01 | Lin   |
| 3    | Control   | C2      | 4.7             | <2.2E-16 | Lin   | 8.1  | 3.9E-05 | Lin   | 3.8             | 9.3E-06 | Lin   | -0.1                          | 2.5E-04 | Lin   | 0.0                           | 1.7E-02 | Lin   |
| 3    | Control   | C3      | 7.2             | <2.2E-16 | Lin   | 9.2  | 5.2E-07 | Lin   | 3.1             | 3.6E-04 | Lin   | -0.1                          | 7.7E-04 | Lin   | 0.0                           | 2.4E-02 | Lin   |
| 3    | Treatment | C4      | 18.1            | <2.2E-16 | Lin   | 36.2 | 2.7E-06 | Lin   | 35.8            | 9.0E-07 | Lin   | 1.1                           | 9.1E-04 | Lin   | 0.0                           | 8.5E-02 | Lin   |
| 3    | Treatment | C5      | 17.2            | <2.2E-16 | Lin   | 35.2 | 1.1E-04 | Lin   | 33.9            | 5.4E-06 | Lin   | 1.0                           | 5.7E-04 | Lin   | 0.0                           | 3.7E-01 | Lin   |
| 3    | Treatment | C6      | 17.6            | <2.2E-16 | Lin   | 36.9 | 1.6E-05 | Lin   | 19.6            | 4.7E-04 | Lin   | 1.0                           | 1.7E-04 | Lin   | 0.0                           | 2.8E-01 | Lin   |
| 5    | Control   | C1      | 3.7             | <2.2E-16 | Lin   | 8.1  | 3.7E-04 | Lin   | 4.6             | 1.9E-05 | Lin   | -0.2                          | 1.5E-02 | Lin   | 0.0                           | 3.2E-01 | Lin   |
| 5    | Control   | C2      | 3.7             | <2.2E-16 | Lin   | 7.9  | 7.4E-05 | Lin   | 4.5             | 1.7E-05 | Lin   | -0.3                          | 7.3E-03 | Lin   | 0.0                           | NA      | Lin   |
| 5    | Control   | C3      | 5.1             | <2.2E-16 | Lin   | 7.6  | 5.5E-04 | Lin   | 3.0             | 1.1E-03 | Lin   | -0.2                          | 2.1E-02 | Lin   | 0.0                           | 3.0E-01 | Lin   |
| 5    | Treatment | C4      | 27.0            | <2.2E-16 | Lin   | 43.5 | 9.2E-06 | Lin   | 38.7            | 3.2E-05 | Lin   | 0.9                           | 2.0E-04 | Lin   | 0.0                           | 3.2E-01 | Lin   |
| 5    | Treatment | C5      | 24.6            | <2.2E-16 | Lin   | 38.1 | 1.7E-05 | Lin   | 36.3            | 9.7E-06 | Lin   | 1.2                           | 8.0E-04 | Lin   | 0.0                           | 3.2E-02 | Lin   |
| 5    | Treatment | C6      | 22.1            | <2.2E-16 | Lin   | 35.6 | 8.6E-06 | Lin   | 27.2            | 3.1E-05 | Lin   | 1.2                           | 2.1E-04 | Lin   | 0.0                           | 1.9E-01 | Lin   |
| 7    | Control   | C1      | NA              | NA       | Lin   | NA   | NA      | Lin   | NA              | NA      | Lin   | NA                            | NA      | Lin   | NA                            | NA      | Lin   |
| 7    | Control   | C2      | NA              | NA       | Lin   | NA   | NA      | Lin   | NA              | NA      | Lin   | NA                            | NA      | Lin   | NA                            | NA      | Lin   |
| 7    | Control   | C3      | NA              | NA       | Lin   | NA   | NA      | Lin   | NA              | NA      | Lin   | NA                            | NA      | Lin   | NA                            | NA      | Lin   |
| 7    | Treatment | C4      | NA              | NA       | Lin   | NA   | NA      | Lin   | 51.6            | 7.3E-04 | Lin   | NA                            | NA      | Lin   | NA                            | NA      | Lin   |
| 7    | Treatment | C5      | NA              | NA       | Lin   | NA   | NA      | Lin   | 51.8            | 7.6E-04 | Lin   | NA                            | NA      | Lin   | NA                            | NA      | Lin   |
| 7    | Treatment | C6      | NA              | NA       | Lin   | NA   | NA      | Lin   | 40.7            | 5.1E-04 | Lin   | NA                            | NA      | Lin   | NA                            | NA      | Lin   |
| 9    | Control   | C1      | 5.0             | <2.2E-16 | Lin   | 7.7  | 3.5E-06 | Lin   | 5.4             | 4.8E-02 | Lin   | -0.4                          | 1.7E-03 | Lin   | 0.0                           | 8.3E-01 | Lin   |
| 9    | Control   | C2      | 3.6             | <2.2E-16 | Lin   | 6.2  | 2.9E-04 | Lin   | 5.1             | 1.5E-02 | Lin   | -0.4                          | 4.4E-04 | Lin   | -0.1                          | 1.8E-01 | Lin   |
| 9    | Control   | C3      | 4.1             | <2.2E-16 | Lin   | 5.9  | 1.5E-05 | Lin   | 5.0             | 9.5E-02 | Lin   | -0.4                          | 9.5E-02 | Lin   | 0.0                           | 5.6E-02 | Lin   |
| 9    | Treatment | C4      | 17.1            | <2.2E-16 | Lin   | 37.6 | 2.0E-05 | Lin   | 38.4            | 1.2E-02 | Lin   | 0.3                           | 2.7E-02 | Lin   | 0.0                           | 9.8E-01 | Lin   |
| 9    | Treatment | C5      | 16.0            | <2.2E-16 | Lin   | 38.3 | 1.8E-06 | Lin   | 40.8            | 3.1E-03 | Lin   | 0.5                           | 2.2E-03 | Lin   | 0.0                           | 3.2E-01 | Lin   |
| 9    | Treatment | C6      | 16.8            | <2.2E-16 | Lin   | 38.4 | 2.5E-07 | Lin   | 49.7            | 1.9E-04 | Lin   | 0.6                           | 5.5E-04 | Lin   | 0.0                           | 1.3E-02 | Lin   |
| 11   | Control   | C1      | 7.4             | <2.2E-16 | Lin   | 9.2  | 2.2E-05 | Lin   | 3.5             | 1.7E-04 | Lin   | -0.1                          | 1.4E-01 | Lin   | 0.0                           | 8.6E-01 | Lin   |
| 11   | Control   | C2      | 5.9             | <2.2E-16 | Lin   | 8.4  | 3.0E-06 | Lin   | 3.5             | 1.3E-04 | Lin   | -0.1                          | 1.4E-01 | Lin   | 0.0                           | 2.6E-01 | Lin   |
| 11   | Control   | C3      | 5.0             | <2.2E-16 | Lin   | 6.8  | 3.8E-04 | Lin   | 2.2             | 6.1E-03 | Lin   | -0.1                          | 5.6E-02 | Lin   | 0.0                           | 5.3E-01 | Lin   |
| 11   | Treatment | C4      | 16.3            | <2.2E-16 | Lin   | 38.4 | 1.4E-05 | Lin   | 22.6            | 8.5E-05 | Lin   | 0.4                           | 8.2E-03 | Lin   | -0.1                          | 1.4E-02 | Lin   |
| 11   | Treatment | C5      | 16.9            | <2.2E-16 | Lin   | 40.2 | 5.6E-06 | Lin   | 25.1            | 1.1E-05 | Lin   | 0.2                           | 1.2E-01 | Lin   | 0.0                           | 1.5E-01 | Lin   |
| 11   | Treatment | C6      | 16.9            | <2.2E-16 | Lin   | 39.4 | 1.2E-05 | Lin   | 26.7            | 8.1E-05 | Lin   | 0.0                           | 1.3E-01 | Lin   | 0.0                           | 1.0E-01 | Lin   |
| 13   | Control   | C1      | 6.7             | <2.2E-16 | Lin   | 8.6  | 1.9E-05 | Lin   | 3.3             | 4.2E-06 | Lin   | -0.1                          | 3.7E-02 | Lin   | 0.0                           | 2.0E-01 | Lin   |
| 13   | Control   | C2      | 7.3             | <2.2E-16 | Lin   | 8.7  | 9.1E-05 | Lin   | 2.7             | 5.9E-03 | Lin   | -0.1                          | 1.3E-01 | Lin   | 0.0                           | 8.7E-01 | Lin   |

|    |           |    |      |          |     |      |         |     |      |         |     |      |         |     |      |         |     |
|----|-----------|----|------|----------|-----|------|---------|-----|------|---------|-----|------|---------|-----|------|---------|-----|
| 13 | Control   | C3 | 6.2  | <2.2E-16 | Lin | 6.8  | 5.7E-04 | Lin | 1.6  | 1.5E-05 | Lin | -0.2 | 4.3E-04 | Lin | 0.0  | 1.0E-02 | Lin |
| 13 | Treatment | C4 | 14.6 | <2.2E-16 | Lin | 37.0 | 2.9E-06 | Lin | 19.8 | 1.9E-05 | Lin | 0.1  | 8.2E-02 | Lin | 0.0  | 5.4E-01 | Lin |
| 13 | Treatment | C5 | 16.1 | <2.2E-16 | Lin | 36.2 | 4.0E-05 | Lin | 20.8 | 3.2E-05 | Lin | 0.1  | 1.2E-02 | Lin | 0.0  | 1.5E-03 | Lin |
| 13 | Treatment | C6 | 16.9 | <2.2E-16 | Lin | 30.9 | 2.3E-04 | Lin | 22.9 | 5.9E-05 | Lin | -0.1 | 1.7E-02 | Lin | 0.0  | 1.8E-01 | Lin |
| 15 | Control   | C1 | 6.3  | <2.2E-16 | Lin | 7.4  | 2.8E-04 | Lin | 3.6  | 4.0E-04 | Lin | -0.5 | 4.0E-04 | Lin | 0.0  | 5.6E-01 | Lin |
| 15 | Control   | C2 | 7.0  | <2.2E-16 | Lin | 7.1  | 1.5E-03 | Lin | 3.7  | 2.8E-04 | Lin | -0.7 | 1.2E-04 | Lin | 0.0  | 9.0E-02 | Lin |
| 15 | Control   | C3 | 6.5  | <2.2E-16 | Lin | 6.4  | 7.3E-03 | Lin | 2.1  | 1.1E-02 | Lin | -0.6 | 2.2E-04 | Lin | -0.1 | 1.0E-01 | Lin |
| 15 | Treatment | C4 | 12.6 | <2.2E-16 | Lin | 26.9 | 7.9E-04 | Lin | 26.5 | 1.3E-04 | Lin | -0.7 | 5.2E-05 | Lin | 0.0  | 5.9E-01 | Lin |
| 15 | Treatment | C5 | 14.2 | <2.2E-16 | Lin | 28.3 | 5.6E-04 | Lin | 27.7 | 4.2E-05 | Lin | -0.4 | 2.5E-02 | Lin | 0.0  | 6.5E-01 | Lin |
| 15 | Treatment | C6 | 13.6 | <2.2E-16 | Lin | 28.2 | 2.6E-04 | Lin | 31.9 | 3.9E-05 | Lin | -1.2 | 6.2E-04 | Lin | -0.1 | 1.3E-02 | Lin |
| 18 | Control   | C1 | 5.1  | <2.2E-16 | Lin | 8.0  | 1.7E-04 | Lin | 2.7  | 3.9E-04 | Lin | 0.1  | 1.4E-02 | Lin | 0.1  | 1.2E-01 | Lin |
| 18 | Control   | C2 | 5.4  | <2.2E-16 | Lin | 8.1  | 7.7E-07 | Lin | 3.1  | 5.3E-06 | Lin | 0.1  | 2.0E-04 | Lin | 0.0  | 1.4E-02 | Lin |
| 18 | Control   | C3 | 6.0  | <2.2E-16 | Lin | 7.0  | 6.5E-04 | Lin | 1.5  | 4.8E-06 | Lin | 0.1  | 2.6E-04 | Lin | 0.0  | 6.0E-02 | Lin |
| 18 | Treatment | C4 | 11.7 | <2.2E-16 | Lin | 16.8 | 2.0E-04 | Lin | 8.5  | 1.8E-05 | Lin | 0.1  | 1.2E-03 | Lin | 0.0  | 7.1E-02 | Lin |
| 18 | Treatment | C5 | 12.9 | <2.2E-16 | Lin | 18.7 | 2.0E-05 | Lin | 9.0  | 1.5E-05 | Lin | 0.3  | 2.5E-04 | Lin | 0.0  | 6.4E-01 | Lin |
| 18 | Treatment | C6 | 11.4 | <2.2E-16 | Lin | 22.5 | 2.4E-05 | Lin | 13.5 | 2.8E-05 | Lin | 0.1  | 2.6E-03 | Lin | 0.0  | 4.6E-01 | Lin |
| 21 | Control   | C1 | 4.6  | <2.2E-16 | Lin | 7.7  | 7.3E-05 | Lin | 3.1  | 1.1E-03 | Lin | 0.1  | 1.4E-02 | Lin | 0.0  | 9.0E-01 | Lin |
| 21 | Control   | C2 | 4.2  | <2.2E-16 | Lin | 6.8  | 5.4E-04 | Lin | 3.2  | 2.4E-03 | Lin | 0.0  | 7.8E-02 | Lin | 0.0  | 4.5E-01 | Lin |
| 21 | Control   | C3 | 4.2  | <2.2E-16 | Lin | 5.5  | 1.8E-03 | Lin | 1.5  | 2.5E-04 | Lin | 0.1  | 1.2E-01 | Lin | 0.0  | 1.0E-02 | Lin |
| 21 | Treatment | C4 | 20.0 | <2.2E-16 | Lin | 27.1 | 1.2E-03 | Lin | 10.0 | 5.3E-05 | Lin | 0.0  | 7.5E-01 | Lin | 0.0  | 5.7E-01 | Lin |
| 21 | Treatment | C5 | 23.0 | <2.2E-16 | Lin | 25.6 | 1.1E-03 | Lin | 10.5 | 5.3E-05 | Lin | 0.0  | 7.0E-01 | Lin | 0.0  | 6.4E-01 | Lin |
| 21 | Treatment | C6 | 24.5 | <2.2E-16 | Lin | 32.5 | 1.2E-03 | Lin | 11.1 | 6.2E-06 | Lin | 0.0  | 8.6E-01 | Lin | 0.0  | 3.1E-01 | Lin |
| 24 | Control   | C1 | 4.9  | <2.2E-16 | Lin | 7.4  | 1.9E-05 | Lin | 3.0  | 1.8E-05 | Lin | 0.1  | 1.8E-03 | Lin | 0.0  | 9.1E-01 | Lin |
| 24 | Control   | C2 | 4.4  | <2.2E-16 | Lin | 6.8  | 8.0E-05 | Lin | 3.1  | 1.8E-04 | Lin | 0.0  | 1.2E-02 | Lin | 0.0  | 5.7E-02 | Lin |
| 24 | Control   | C3 | NA   | NA       | Lin | 5.0  | 6.7E-04 | Lin | 1.7  | 1.3E-03 | Lin | 0.0  | 4.1E-02 | Lin | 0.0  | 3.2E-01 | Lin |
| 24 | Treatment | C4 | 9.4  | <2.2E-16 | Lin | 15.1 | 2.0E-04 | Lin | 6.4  | 2.6E-06 | Lin | 0.0  | 3.4E-01 | Lin | 0.0  | 2.1E-01 | Lin |
| 24 | Treatment | C5 | 9.9  | <2.2E-16 | Lin | 15.2 | 3.8E-06 | Lin | 7.4  | 4.7E-06 | Lin | 0.1  | 4.3E-02 | Lin | 0.0  | 5.2E-02 | Lin |
| 24 | Treatment | C6 | NA   | NA       | Lin | 11.0 | 4.3E-03 | Lin | 5.3  | 4.7E-04 | Lin | 0.0  | 1.5E-01 | Lin | 0.0  | 5.5E-01 | Lin |

**Table S1: Oxygen (O<sub>2</sub>), dissolved inorganic carbon (DIC), alkalinity (A<sub>T</sub>), nitrate (NO<sub>3</sub><sup>-</sup>), and ammonium (NH<sub>4</sub><sup>+</sup>) fluxes (F) calculated from the linear (lin) or quadratic (quad) regression of overlying water concentrations over time. All fluxes are expressed in mmol m<sup>-2</sup> d<sup>-1</sup>, and corresponding p-values of the regression model are supplied. For quadratic models, the p-value of the quadratic term of the model is shown.**

| Week | Treatment | Chamber | f_carb | Intercept | p_value | R_diss |
|------|-----------|---------|--------|-----------|---------|--------|
| 1    | Control   | C1      | 13.3   | -21.1     | 6.5E-04 | 0.9    |
| 1    | Control   | C2      | 3.4    | -22.9     | 5.6E-04 | 0.2    |
| 1    | Control   | C3      | 16.4   | -19.5     | 1.3E-03 | 1.1    |
| 1    | Treatment | C4      | 22.9   | -17.4     | 1.5E-02 | 9.5    |
| 1    | Treatment | C5      | 20.9   | -17.3     | 1.4E-02 | 9.3    |
| 1    | Treatment | C6      | 23.5   | -16.5     | 8.1E-03 | 10.2   |
| 3    | Control   | C1      | 13.6   | -21.0     | 8.4E-05 | 1.1    |
| 3    | Control   | C2      | 23.9   | -18.2     | 1.0E-04 | 1.9    |
| 3    | Control   | C3      | 13.8   | -20.2     | 6.6E-04 | 1.3    |
| 3    | Treatment | C4      | 19.4   | -18.2     | 1.0E-04 | 7.0    |
| 3    | Treatment | C5      | 25.9   | -16.2     | 2.0E-03 | 9.1    |
| 3    | Treatment | C6      | 23.4   | -16.5     | 2.5E-04 | 8.6    |
| 5    | Control   | C1      | -9.8   | -27.1     | 7.6E-03 | NA     |
| 5    | Control   | C2      | 15.4   | -20.1     | 6.4E-04 | 1.2    |
| 5    | Control   | C3      | 4.3    | -22.5     | 6.4E-03 | 0.3    |
| 5    | Treatment | C4      | 50.3   | -11.4     | 2.6E-03 | 21.9   |
| 5    | Treatment | C5      | 43.9   | -12.5     | 1.8E-04 | 16.7   |
| 5    | Treatment | C6      | 28.0   | -15.5     | 1.4E-04 | 10.0   |
| 7    | Control   | C1      | NA     | NA        | NA      | NA     |
| 7    | Control   | C2      | NA     | NA        | NA      | NA     |
| 7    | Control   | C3      | NA     | NA        | NA      | NA     |
| 7    | Treatment | C4      | NA     | NA        | NA      | NA     |
| 7    | Treatment | C5      | NA     | NA        | NA      | NA     |
| 7    | Treatment | C6      | NA     | NA        | NA      | NA     |
| 9    | Control   | C1      | 9.6    | -22.1     | 8.1E-04 | 0.7    |
| 9    | Control   | C2      | 14.7   | -20.3     | 3.8E-03 | 0.9    |
| 9    | Control   | C3      | 11.8   | -20.7     | 1.4E-03 | 0.7    |
| 9    | Treatment | C4      | 56.0   | -10.2     | 1.4E-04 | 21.0   |
| 9    | Treatment | C5      | 67.0   | -7.7      | 2.2E-04 | 25.7   |
| 9    | Treatment | C6      | 55.6   | -9.8      | 8.7E-04 | 21.3   |
| 11   | Control   | C1      | 13.3   | -21.1     | 7.0E-04 | 1.2    |
| 11   | Control   | C2      | 19.8   | -19.2     | 2.4E-03 | 1.7    |
| 11   | Control   | C3      | 13.3   | -20.3     | 4.6E-03 | 0.9    |
| 11   | Treatment | C4      | 54.3   | -10.5     | 1.8E-03 | 20.9   |
| 11   | Treatment | C5      | 53.8   | -10.5     | 5.2E-03 | 21.6   |
| 11   | Treatment | C6      | 56.3   | -9.6      | 1.8E-04 | 22.2   |
| 13   | Control   | C1      | -4.6   | -25.7     | 1.8E-04 | NA     |
| 13   | Control   | C2      | -6.5   | -25.2     | 3.0E-03 | NA     |
| 13   | Control   | C3      | -9.1   | -25.8     | 8.0E-03 | NA     |
| 13   | Treatment | C4      | 52.1   | -11.0     | 2.8E-03 | 19.3   |
| 13   | Treatment | C5      | 48.7   | -11.5     | 7.3E-04 | 17.6   |
| 13   | Treatment | C6      | 39.2   | -13.2     | 1.1E-03 | 12.1   |
| 15   | Control   | C1      | -9.1   | -26.9     | 9.2E-03 | NA     |
| 15   | Control   | C2      | -6.2   | -25.1     | 4.1E-03 | NA     |
| 15   | Control   | C3      | 6.4    | -22.0     | 2.7E-03 | 0.4    |
| 15   | Treatment | C4      | 40.3   | -13.6     | 4.5E-03 | 10.8   |
| 15   | Treatment | C5      | 50.2   | -11.2     | 1.1E-03 | 14.2   |
| 15   | Treatment | C6      | 49.3   | -11.1     | 6.3E-03 | 13.9   |
| 18   | Control   | C1      | 8.9    | -22.3     | 9.7E-03 | 0.7    |
| 18   | Control   | C2      | -2.8   | -24.3     | 3.9E-04 | NA     |
| 18   | Control   | C3      | -9.1   | -25.8     | 2.8E-05 | NA     |
| 18   | Treatment | C4      | 28.6   | -16.2     | 1.0E-03 | 4.8    |
| 18   | Treatment | C5      | 27.6   | -15.9     | 3.3E-03 | 5.2    |
| 18   | Treatment | C6      | 37.7   | -13.5     | 1.4E-03 | 8.5    |
| 21   | Control   | C1      | 13.0   | -21.2     | 3.1E-04 | 1.0    |
| 21   | Control   | C2      | -0.8   | -23.9     | 1.1E-03 | NA     |
| 21   | Control   | C3      | -8.5   | -25.6     | 1.3E-02 | NA     |
| 21   | Treatment | C4      | 34.3   | -14.9     | 8.4E-02 | 9.3    |
| 21   | Treatment | C5      | -3.3   | -22.3     | 4.7E-02 | NA     |
| 21   | Treatment | C6      | 14.3   | -18.4     | 3.1E-05 | 4.6    |

|    |           |    |      |       |         |     |
|----|-----------|----|------|-------|---------|-----|
| 24 | Control   | C1 | 2.4  | -23.9 | 1.2E-05 | 0.2 |
| 24 | Control   | C2 | 7.8  | -21.9 | 2.6E-04 | 0.5 |
| 24 | Control   | C3 | 0.9  | -23.3 | 3.4E-03 | 0.0 |
| 24 | Treatment | C4 | 9.1  | -20.5 | 8.3E-04 | 1.4 |
| 24 | Treatment | C5 | 10.9 | -19.3 | 1.5E-04 | 1.7 |
| 24 | Treatment | C6 | 31.9 | -14.7 | 2.5E-02 | 3.5 |

**Table S2: Calcium carbonate dissolution fractions ( $f_{\text{carb}}$ , %) and rates ( $R_{\text{diss}}$ ,  $\text{mmol m}^{-2} \text{d}^{-1}$ ), calculated using the Keeling plot approach. Intercepts and p-values of the linear regression models are supplied.**
